# Supplementary material for: Amino Acid Metabolites and Slow Weight Loss in the Early Postoperative Period after Sleeve Gastrectomy
Source: PubMed Central journal article supplement (PMC7463855; doi:10.3390/jcm9082348), 2020-07-23
Supplement: jcm-09-02348-s001.pdf [file jcm-09-02348-s001.pdf]

Supplementary Materials

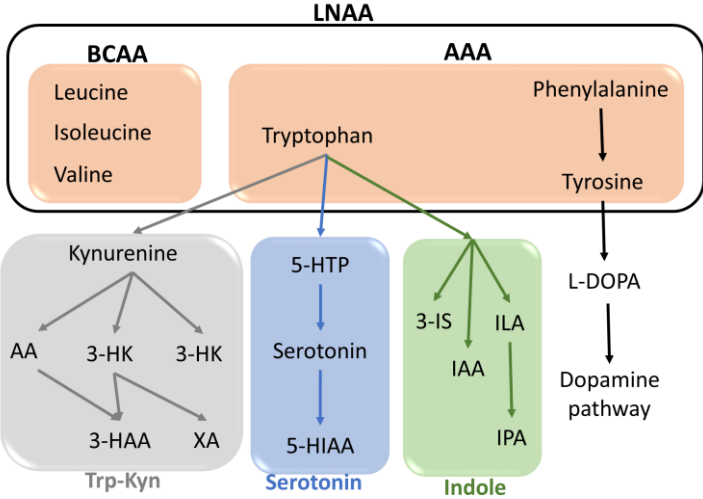

Figure S1. Amino acid metabolites analyzed in the current study.

**Table S1.** Inclusion and exclusion criteria

|                    | Entry into the study would require that the patient:                                                                                                                                                                                                                                                                                                                                                                                                                                                                                                                                                                                                                                                                                                                                                                                                                                                                                                                                                                                                                                                                                                                                                                                                                                                                                                                                                                                                                                                                                                                                                                                                                                                                                                                                                                                                                                                                                                                                                                                                                                                                                                                                                                                                                                                                                                                                                                                                                                                           |
|--------------------|----------------------------------------------------------------------------------------------------------------------------------------------------------------------------------------------------------------------------------------------------------------------------------------------------------------------------------------------------------------------------------------------------------------------------------------------------------------------------------------------------------------------------------------------------------------------------------------------------------------------------------------------------------------------------------------------------------------------------------------------------------------------------------------------------------------------------------------------------------------------------------------------------------------------------------------------------------------------------------------------------------------------------------------------------------------------------------------------------------------------------------------------------------------------------------------------------------------------------------------------------------------------------------------------------------------------------------------------------------------------------------------------------------------------------------------------------------------------------------------------------------------------------------------------------------------------------------------------------------------------------------------------------------------------------------------------------------------------------------------------------------------------------------------------------------------------------------------------------------------------------------------------------------------------------------------------------------------------------------------------------------------------------------------------------------------------------------------------------------------------------------------------------------------------------------------------------------------------------------------------------------------------------------------------------------------------------------------------------------------------------------------------------------------------------------------------------------------------------------------------------------------|
| Inclusion criteria | <ol style="list-style-type: none"><li>1. <math>\geq 20</math> years old</li><li>2. body mass index <math>\geq 35</math> kg/m<sup>2</sup>, or a body mass index <math>\geq 30</math> kg/m<sup>2</sup> and at least one or more obesity-related co-morbidities.</li></ol>                                                                                                                                                                                                                                                                                                                                                                                                                                                                                                                                                                                                                                                                                                                                                                                                                                                                                                                                                                                                                                                                                                                                                                                                                                                                                                                                                                                                                                                                                                                                                                                                                                                                                                                                                                                                                                                                                                                                                                                                                                                                                                                                                                                                                                        |
| Exclusion criteria | <ol style="list-style-type: none"><li>1. Prior complex gastrointestinal surgery, including that of the stomach, small intestine, large intestine, bile duct, pancreas, and spleen; Nissen and trauma (except hemorrhoidectomy, herniorrhaphy, and appendectomy);</li><li>2. abdominal, thoracic, pelvic, and/or obstetric-gynecologic surgery within 3 months or at the discretion of the Investigator;</li><li>3. cardiovascular conditions including significant known coronary artery disease (CAD), uncompensated congestive heart failure, history of stroke, or uncontrolled hypertension (defined as medially treated with the mean of three separate measurements SBP <math>&gt;180</math> mmHg or DBP <math>&gt;110</math> mmHg). Subjects with CAD who were successfully treated with coronary artery bypass grafts or percutaneous coronary interventions within 3 months and who have no evidence of active ischemia are eligible;</li><li>4. kidney diseases including renovascular hypertension, renal artery stenosis, or end-stage renal disease;</li><li>5. known history of chronic liver diseases including liver cirrhosis and alpha-1-antitrypsin deficiency;</li><li>6. gastrointestinal disorders including a known history of celiac disease or any other malabsorptive disorders or inflammatory bowel disease (Crohn's disease or ulcerative colitis);</li><li>7. psychiatric disorders including dementia, active psychosis, history of suicide attempts, and alcohol or drug abuse within 12 months;</li><li>8. severe pulmonary disease defined as forced expiratory volume-one second (FEV-1) <math>&lt; 50\%</math> of the predicted value;</li><li>9. anemia defined as hemoglobin <math>&lt; 8</math> g/dL in females and <math>10</math> g/dL in males;</li><li>10. malignancy within 5 years (except squamous cell and basal cell cancer of the skin). Patients diagnosed with early or stage 1 cancer that was successfully treated are eligible based on the Investigator's discretion;</li><li>11. any condition or major illness that in the Investigator's judgement places the subject at undue risk by participating in the study;</li><li>12. pregnancy;</li><li>13. unable to understand the risks, realistic benefits, and compliance requirements of each program;</li><li>14. use of investigational therapy or participation in any other clinical trial within 3 months; and</li><li>15. plans to move outside South Korea within the next 2 years.</li></ol> |

---

**Table S2.** Protocol for measurement of serum amino acids metabolites

---

1. Amino acids and their metabolites were quantified using liquid chromatography-mass spectrometry (LC-MS) based on previous publication methods<sup>1,2</sup>. Briefly, 10  $\mu\text{L}$  of  $^{13}\text{C}$ -tryptophan (5  $\mu\text{M}$ ), as the internal standard (IS), was added to 100  $\mu\text{L}$  of serum and standard solution in 4% bovine serum albumin solution and diluted with 20  $\mu\text{L}$  of water containing 0.1% formic acid (v/v). Subsequently, 400  $\mu\text{L}$  of cold acetonitrile for protein precipitation was added, vortexed, centrifuged at 10,000  $\times$  g at 4°C for 10 min. Next, 400  $\mu\text{L}$  of the supernatant was dried using a speed vacuum evaporator and reconstituted in 0.1% formic acid in water/acetonitrile (9/1, v/v) solution. Then, 10  $\mu\text{L}$  of the samples were injected into an HPLC-MS/MS system (Agilent 1200 HPLC equipped with AB SCIex 3200 Mass analyzer) equipped with the Waters Atlantis T3 (4.6 $\times$ 150 mm i.d., 3  $\mu\text{m}$ ) column at 30°C.
  2. Ions of each analyzed compound, except the IS, were detected in a positive ionization mode using the multiple reaction monitoring mode. Liquid chromatographic separation was performed with mobile phases A (0.1% formic acid in water, v/v) and B (0.1% formic acid in acetonitrile, v/v) at 0.5 mL/min flow rate under the following conditions: 5% for the first gradient starting at 5% B to 40% B in 6 min, to 90% B in 5 min, staying at 90% B for 5 min, then to 5% B in 1 min. The column equilibration was performed for 8 min before each analysis under the 5% B condition.
  3. In terms of the MS conditions, the ion source temperature was set to 600°C. The curtain and nebulizer gas were set at 20 psi and 50 psi, respectively. The MS capillary voltage was 4.5 kV for the positive mode or -4.5 kV for the negative mode. The acquired data were analyzed using Analyst software (v1.6.3, SCIex, USA).
  4. In addition to metabolite measurements, we calculated ratios between adjacent metabolites to compare the activity of enzymes among participants: 5-HTP/ tryptophan ratio for tryptophan hydroxylase (TPH), serotonin/5-HTP ratio for aromatic L-amino acid decarboxylase (AADC), 5-HIAA/serotonin ratio for monoamine oxidase A (MAO-A), kynurenine/tryptophan ratio for tryptophan 2,3-dioxygenase (TDO), AA/kynurenine ratio for kynureninase (KYNU), 3-HK/kynurenine ratio for kynurenine 3-monoxygenase (KMO), 3-HAA/3-HK ratio for kynureninase (KYNU), KA/kynurenine ratio for kynurenine aminotransferase (KAT), XA/3-HK ratio for kynurenine aminotransferase (KAT), tyrosine/phenylalanine ratio for p-hydroxyphenylacetaldehyde (PHA), and LDOPA/tyrosine ratio for tyrosine hydroxylase (TH).
- 

<sup>1</sup> Zhu W, Stevens AP, Dettmer K, et al. Quantitative profiling of tryptophan metabolites in serum, urine, and cell culture supernatants by liquid chromatography-tandem mass spectrometry. *Anal Bioanal Chem* 2011;401:3249-3261.

<sup>2</sup> Choi JM, Park WS, Song KY, et al. Development of simultaneous analysis of tryptophan metabolites in serum and gastric juice - an investigation towards establishing a biomarker test for gastric cancer diagnosis. *Biomed Chromatogr* 2016;30:1963-1974.

**Table S3.** Chromatographic Retention time (RT), selected MRM parameters, DP, EP, CE, CXP for each analyte measured

| Compounds                                                                                        | Exact Mass | RT   | Ion mode | [MH+] or [M-H]- | Product Ion Mass | DP   | EP   | CE   | CXP   |
|--------------------------------------------------------------------------------------------------|------------|------|----------|-----------------|------------------|------|------|------|-------|
| Leucine (C <sub>6</sub> H <sub>13</sub> NO <sub>2</sub> )                                        | 131.095    | 6.5  | Pos      | 132.1           | 43.2             | 21   | 7.5  | 31.  | 10    |
|                                                                                                  |            |      |          |                 | 86.1             | 21   | 7.5  | 31.0 | 10    |
| Isoleucine (C <sub>6</sub> H <sub>13</sub> NO <sub>2</sub> )                                     | 131.095    | 6.2  | Pos      | 132.0           | 86.1             | 26   | 5.5  | 21.0 | 10    |
| Valine (C <sub>5</sub> H <sub>11</sub> NO <sub>2</sub> )                                         | 117.0789   | 4.1  | Pos      | 118.1           | 72.1             | 26   | 5.0  | 19.0 | 10    |
| Phenylalanine (C <sub>9</sub> H <sub>11</sub> NO <sub>2</sub> )                                  | 165.079    | 7.3  | Pos      | 166.2           | 103.2            | 21   | 3.0  | 33.0 | 10    |
|                                                                                                  |            |      |          |                 | 120.2            | 21   | 3.0  | 19.0 | 10    |
| Tyrosine (C <sub>9</sub> H <sub>11</sub> NO <sub>3</sub> )                                       | 181.074    | 6.3  | Pos      | 181.9           | 91.2             | 26   | 6.0  | 35.0 | 14    |
|                                                                                                  |            |      |          |                 | 136.1            | 26   | 5.5  | 35.0 | 14    |
| Tryptophan (C <sub>11</sub> H <sub>12</sub> N <sub>2</sub> O <sub>2</sub> )                      | 204.09     | 8.1  | Pos      | 205.0           | 117.9            | 26   | 6.0  | 33.0 | 12    |
|                                                                                                  |            |      |          |                 | 158.8            | 26   | 6.0  | 33.0 | 12    |
| Kynurenine (C <sub>10</sub> H <sub>12</sub> N <sub>2</sub> O <sub>3</sub> )                      | 208.0848   | 7.4  | Pos      | 209.1           | 94.0             | 26   | 5.0  | 19.0 | 10    |
|                                                                                                  |            |      |          |                 | 192.200          | 26   | 5.0  | 13.0 | 10.0  |
| Kynurenic acid (C <sub>10</sub> H <sub>7</sub> NO <sub>3</sub> )                                 | 189.043    | 9.2  | Pos      | 189.900         | 116.000          | 31   | 3.0  | 39.0 | 12.0  |
|                                                                                                  |            |      |          |                 | 143.900          | 21   | 3.0  | 39.0 | 12.0  |
| Anthranilic acid (C <sub>7</sub> H <sub>7</sub> NO <sub>2</sub> )                                | 137.048    | 11.4 | Pos      | 138.106         | 92.100           | 16   | 3.0  | 27.0 | 14.0  |
|                                                                                                  |            |      |          |                 | 119.900          | 16   | 3.0  | 15.0 | 14.0  |
| Xanthurenic acid (C <sub>10</sub> H <sub>7</sub> NO <sub>4</sub> )                               | 205.0375   | 8.1  | Pos      | 206.071         | 132.200          | 51   | 10.5 | 41.0 | 12.0  |
|                                                                                                  |            |      |          |                 | 159.900          | 51   | 10.5 | 23.0 | 12.0  |
| 3-Hydroxykynurenine (C <sub>10</sub> H <sub>12</sub> N <sub>2</sub> O <sub>4</sub> )             | 224.0797   | 6.2  | Pos      | 225.061         | 110.100          | 26   | 8.5  | 23.0 | 20.0  |
|                                                                                                  |            |      |          |                 | 208.100          | 26   | 8.5  | 13.0 | 20.0  |
| 3-Hydroxyanthranilic acid (C <sub>7</sub> H <sub>7</sub> NO <sub>3</sub> )                       | 153.043    | 9.0  | Pos      | 154.000         | 108.100          | 26   | 2.5  | 25.0 | 10.0  |
|                                                                                                  |            |      |          |                 | 136.200          | 21   | 2.0  | 25.0 | 10.0  |
| 5-hydroxyindoleacetic acid (C <sub>10</sub> H <sub>9</sub> NO <sub>3</sub> )                     | 191.058    | 9.6  | Pos      | 192.100         | 146.100          | 26.0 | 5.5  | 29.0 | 10.0  |
| 5-Hydroxytryptophan (C <sub>11</sub> H <sub>12</sub> N <sub>2</sub> O <sub>3</sub> )             | 220.084    | 6.9  | Pos      | 221.100         | 175.000          | 26.0 | 5.5  | 23.0 | 12.0  |
| L-Dihydroxyphenylalanine (C <sub>9</sub> H <sub>11</sub> NO <sub>4</sub> )                       | 197.069    | 5.0  | Pos      | 197.934         | 107.200          | 36.0 | 4.0  | 29.0 | 14.0  |
|                                                                                                  |            |      |          |                 | 152.000          | 36.0 | 4.0  | 21.0 | 14.0  |
| Indole-3-acetic acid (C <sub>10</sub> H <sub>9</sub> NO <sub>2</sub> )                           | 175.063    | 11.8 | Pos      | 176.100         | 130.100          | 26.0 | 4.5  | 21.0 | 10.0  |
| Indole-3-propionic acid (C <sub>11</sub> H <sub>11</sub> NO <sub>2</sub> )                       | 189.079    | 12.4 | Pos      | 190.100         | 129.800          | 16.0 | 3.5  | 17.0 | 10.0  |
|                                                                                                  |            |      |          |                 | 172.100          | 16.0 | 3.0  | 17.0 | 10.0  |
| Indole-3-lactic acid (C <sub>11</sub> H <sub>11</sub> NO <sub>3</sub> )                          | 205.074    | 11.1 | Pos      | 206.100         | 130.000          | 21.0 | 3.5  | 25.0 | 12.0  |
|                                                                                                  |            |      |          |                 | 187.800          | 26.0 | 3.5  | 25.0 | 12.0  |
| Indoxyl sulfate (C <sub>8</sub> H <sub>7</sub> NO <sub>4</sub> S)                                | 213.01     | 10.8 | Neg      | 211.919         | 79.800           | -    | -1.0 | -    | -16.0 |
|                                                                                                  |            |      |          |                 | 131.800          | 65.0 | -1.0 | 28.0 | -16.0 |
| IS( <sup>13</sup> C-Tryptophan) (C <sub>11</sub> H <sub>12</sub> N <sub>2</sub> O <sub>2</sub> ) | 215.09     | 8.3  | Pos      | 216.100         | 126.100          | 26.0 | 5.5  | 33.0 | 12.0  |
|                                                                                                  |            |      | Neg      | 214.000         | 124.100          | 50.0 | 10.0 | 24.0 | -12.0 |

MRM: multiple reaction mode, DP: declustering potential, EP: entrance potential, CE: collision energy, CXP: collision cell exit potential, IS: internal standard, [MH+]: positive ion mode, [M-H]-: negative ion mode

**Table S4.** Association between baseline amino acid metabolites and %EWL at 3 and 6 month after sleeve gastrectomy

|                                            | %EWL at 3 months |         | %EWL at 6 months |         |
|--------------------------------------------|------------------|---------|------------------|---------|
|                                            | $\beta$ (SE)     | P-value | $\beta$ (SE)     | P-value |
| <b>Metabolites from kynurenine pathway</b> |                  |         |                  |         |
| Kynurenine*                                | 42.3 (45.6)      | 0.366   | 83.4 (77.0)      | 0.299   |
| Anthranilic acid                           | -159.3 (308.6)   | 0.612   | -515.7 (481.4)   | 0.304   |
| 3-Hydroxykynurenine                        | 323.0 (302.5)    | 0.300   | 520.3 (511.5)    | 0.328   |
| 3-Hydroxyanthranilic acid*                 | -32.6 (49.2)     | 0.516   | -84.7 (74.7)     | 0.278   |
| Kynurenic acid*                            | 26.3 (25.6)      | 0.318   | 59.8 (40.5)      | 0.164   |
| Xanthurenic acid*                          | -7.4 (29.2)      | 0.803   | -17.8 (44.8)     | 0.697   |
| <b>Metabolites from indole pathway</b>     |                  |         |                  |         |
| Indoxyl sulfate                            | 1.11 (2.25)      | 0.628   | 1.10 (4.40)      | 0.806   |
| Indole-3-acetic acid                       | 0.57 (4.86)      | 0.907   | -4.54 (8.69)     | 0.610   |
| Indole-3-lactic acid*                      | 38.54 (31.61)    | 0.239   | 58.22 (52.34)    | 0.286   |
| Indole-3-propionic acid*                   | -8.47 (6.20)     | 0.189   | -15.81 (13.14)   | 0.251   |
| <b>Metabolites from tyrosine pathway</b>   |                  |         |                  |         |
| L-Dihydroxyphenylalanine                   | -106 (764)       | 0.891   | -721 (1119)      | 0.531   |

%EWL: % excess weight loss, SE: standard error  
Regression models were adjusted for baseline body mass index. %EWL was calculated by dividing the number of kilograms lost by the number of kilograms in a patient's excess body weight.  
\*Data were log-transformed to increase normality before analyses

**Table S5.** Sensitivity analyses: association between baseline serotonin and serotonin/5-hydroxytryptophan ratio, and %EWL after sleeve gastrectomy

|                                              | n  | Serotonin                             |         |              |         |
|----------------------------------------------|----|---------------------------------------|---------|--------------|---------|
|                                              |    | 3 months                              |         | 6 months     |         |
|                                              |    | $\beta$ (SE)                          | P-value | $\beta$ (SE) | P-value |
| Age, $\geq$ 45 yrs                           | 11 | -71.2 (28.7)                          | 0.038   | -51.2 (21.7) | 0.036   |
| Female                                       | 14 | -38.4 (14.1)                          | 0.020   | -38.5 (17.5) | 0.056   |
| Body mass index, $\geq$ 35 kg/m <sup>2</sup> | 14 | -23.4 (9.1)                           | 0.027   | -30.6 (13.4) | 0.041   |
| Hypertension                                 | 13 | -72.8 (27.2)                          | 0.023   | -60.9 (54.1) | 0.013   |
| Diabetes                                     | 15 | -39.1 (16.0)                          | 0.031   | -42.0 (28.1) | 0.070   |
| Non-smoker                                   | 18 | -27.3 (9.6)                           | 0.013   | -31.5 (14.8) | 0.060   |
|                                              |    | Serotonin / 5-hydroxytryptophan ratio |         |              |         |
|                                              | n  | 3 months                              |         | 6 months     |         |
|                                              |    | $\beta$ (SE)                          | P-value | $\beta$ (SE) | P-value |
| Age $\geq$ 45 yrs                            | 11 | -85.9 (37.0)                          | 0.049   | -54.3 (26.6) | 0.064   |
| Female                                       | 14 | -50.2 (18.4)                          | 0.020   | -46.8 (22.1) | 0.063   |
| Body mass index, $\geq$ 35 kg/m <sup>2</sup> | 14 | -22.2 (10.0)                          | 0.049   | -54.4 (25.7) | 0.054   |
| Hypertension                                 | 13 | -75.7 (38.5)                          | 0.078   | -52.9 (73.4) | 0.191   |
| Diabetes                                     | 15 | -40.1 (19.3)                          | 0.060   | -44.0 (33.2) | 0.117   |
| Non-smoker                                   | 18 | -30.1 (12.1)                          | 0.026   | -31.2 (18.3) | 0.120   |

%EWL, % excess weight loss; SE, standard error. Regression models were adjusted for baseline body mass index. %EWL was calculated by dividing the number of kilograms lost by the number of kilograms in a patient's excess body weight.
